# Supplementary material
Source: PubMed Central journal article supplement (PMC4585461)

Figure S4

A:

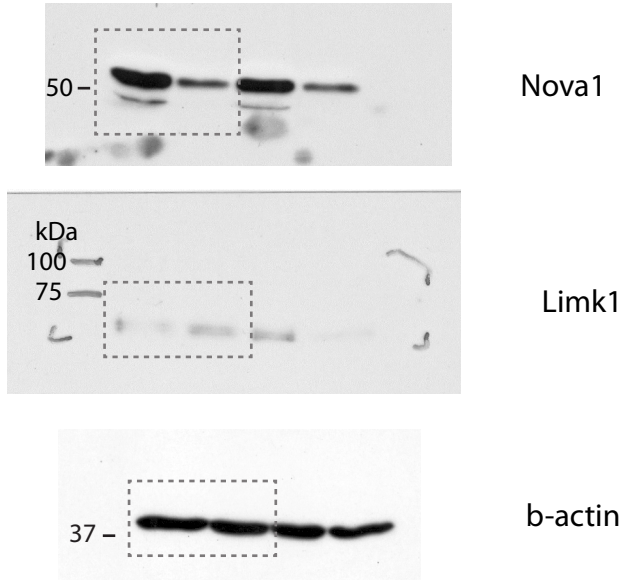

used in this figure

C+D:

Anti-Ncoa3, anti-Limk1 and anti- $\alpha$ -tubulin Westerns of  
- experiment 2 C and N samples in Fig. S4C  
- experiment 3 C and N samples in Fig. S4D

conditions:

B - basal (uninfected)  
P - rAAV-control shRNA  
N - rAAV-Ncoa3 shRNA

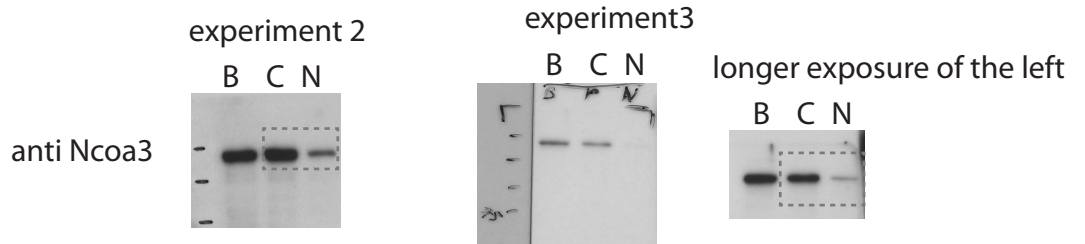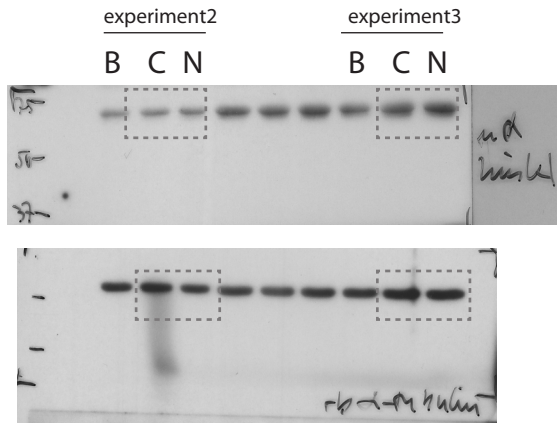

Supplement: embj0034-2237-sd5.pdf [file embj0034-2237-sd5.pdf]
