# Supplementary material
Source: PubMed Central journal article supplement (PMC4585461)

Figure 4

A: rAAV-Nova1 shRNA and Limk1 Western

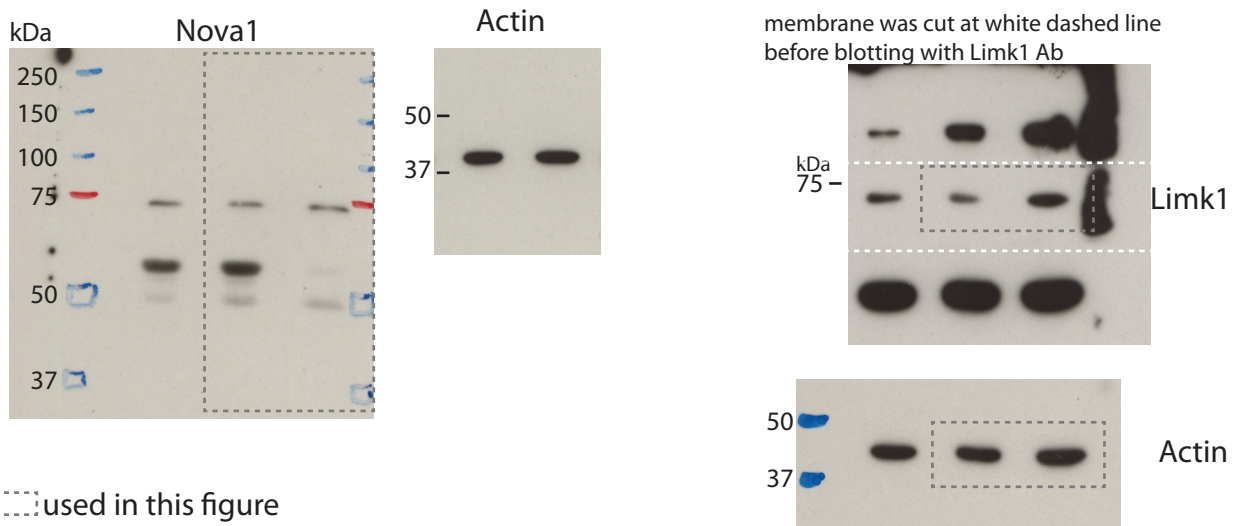

B: rAAV-Ncoa3 shRNA and Limk1 Western

conditions:

- B - basal (uninfected)
- P - rAAV-control shRNA
- N - rAAV-Ncoa3 shRNA

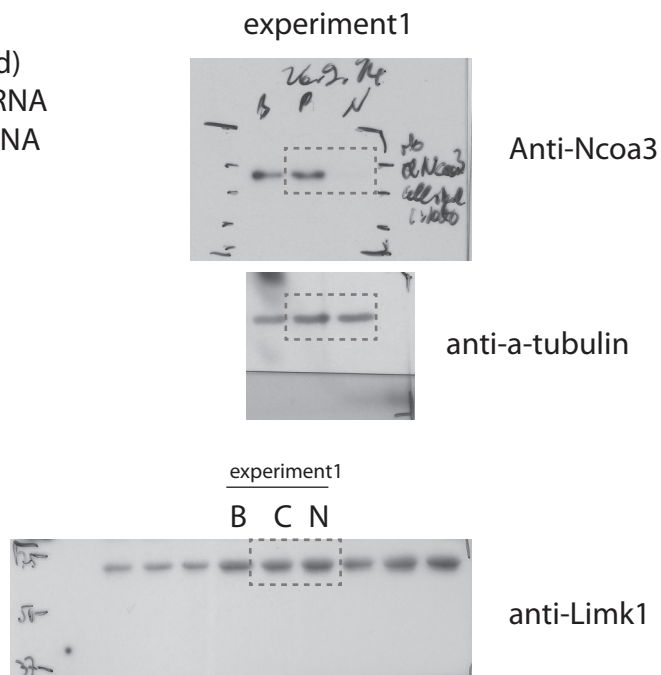

Supplement: embj0034-2237-sd15.pdf [file embj0034-2237-sd15.pdf]
