# Supplementary material
Source: PubMed Central journal article supplement (PMC4585461)

Figure 2

A:

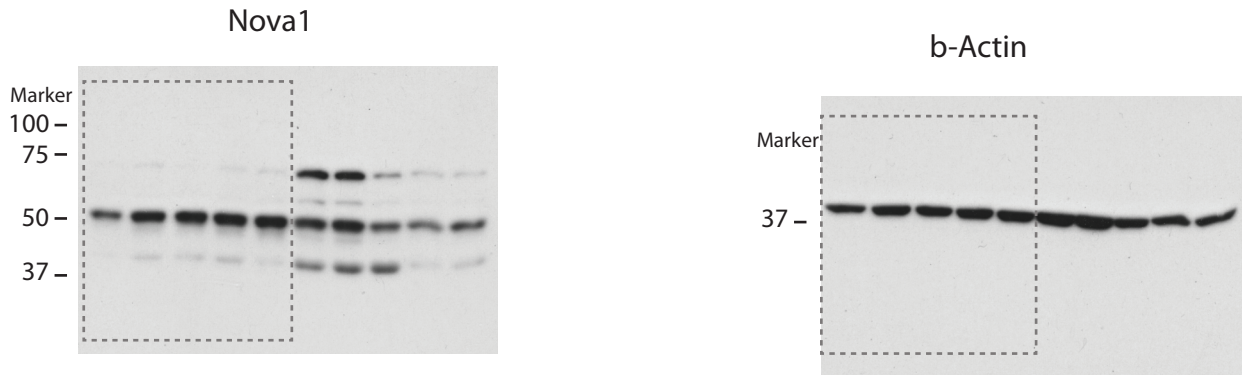

used in this figure

B:

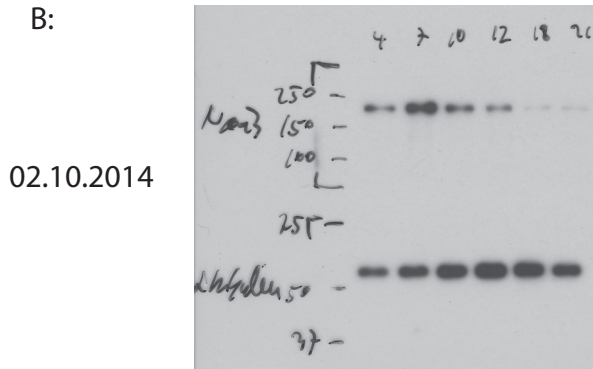

G:

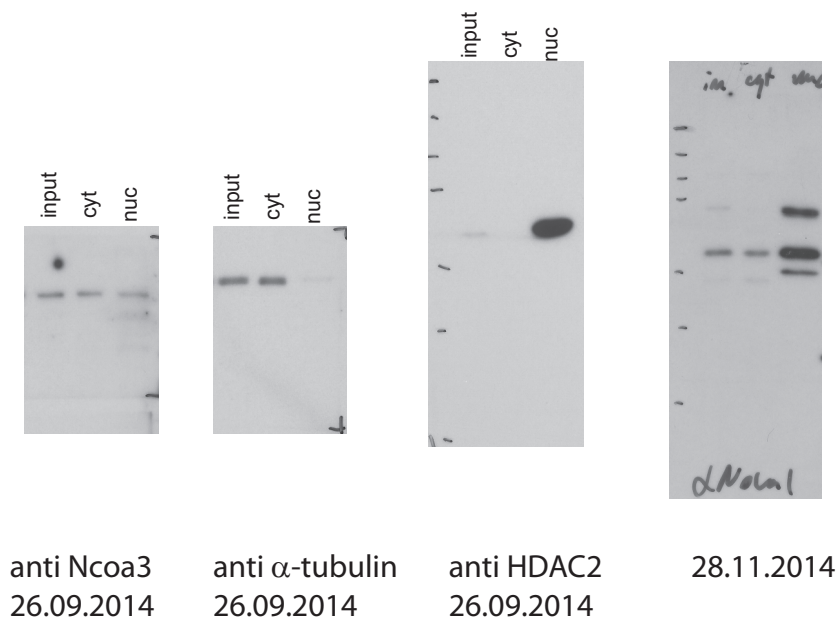

Supplement: embj0034-2237-sd14.pdf [file embj0034-2237-sd14.pdf]

Figure 5

A

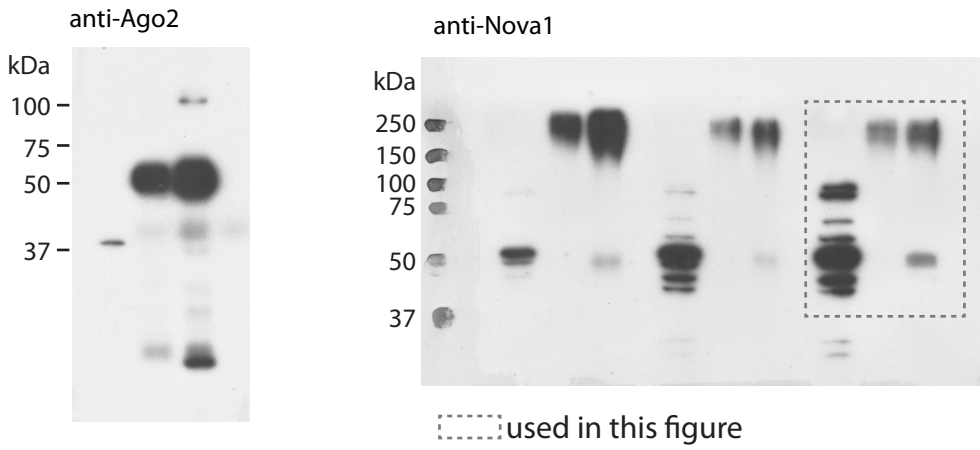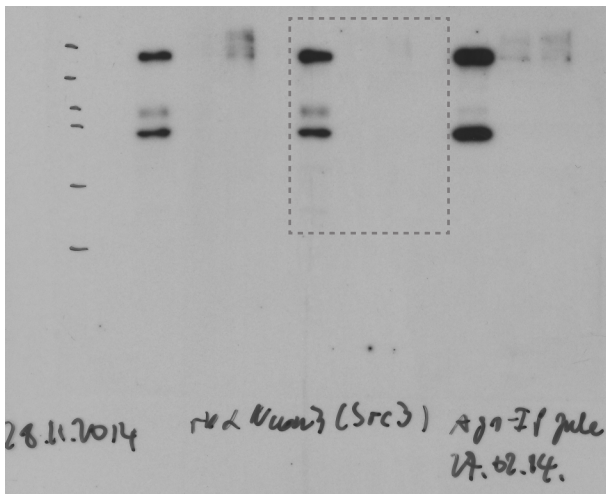

B

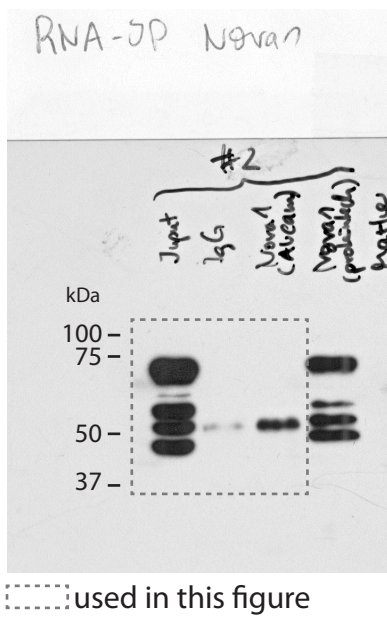

Supplement: embj0034-2237-sd16.pdf [file embj0034-2237-sd16.pdf]

Figure S1

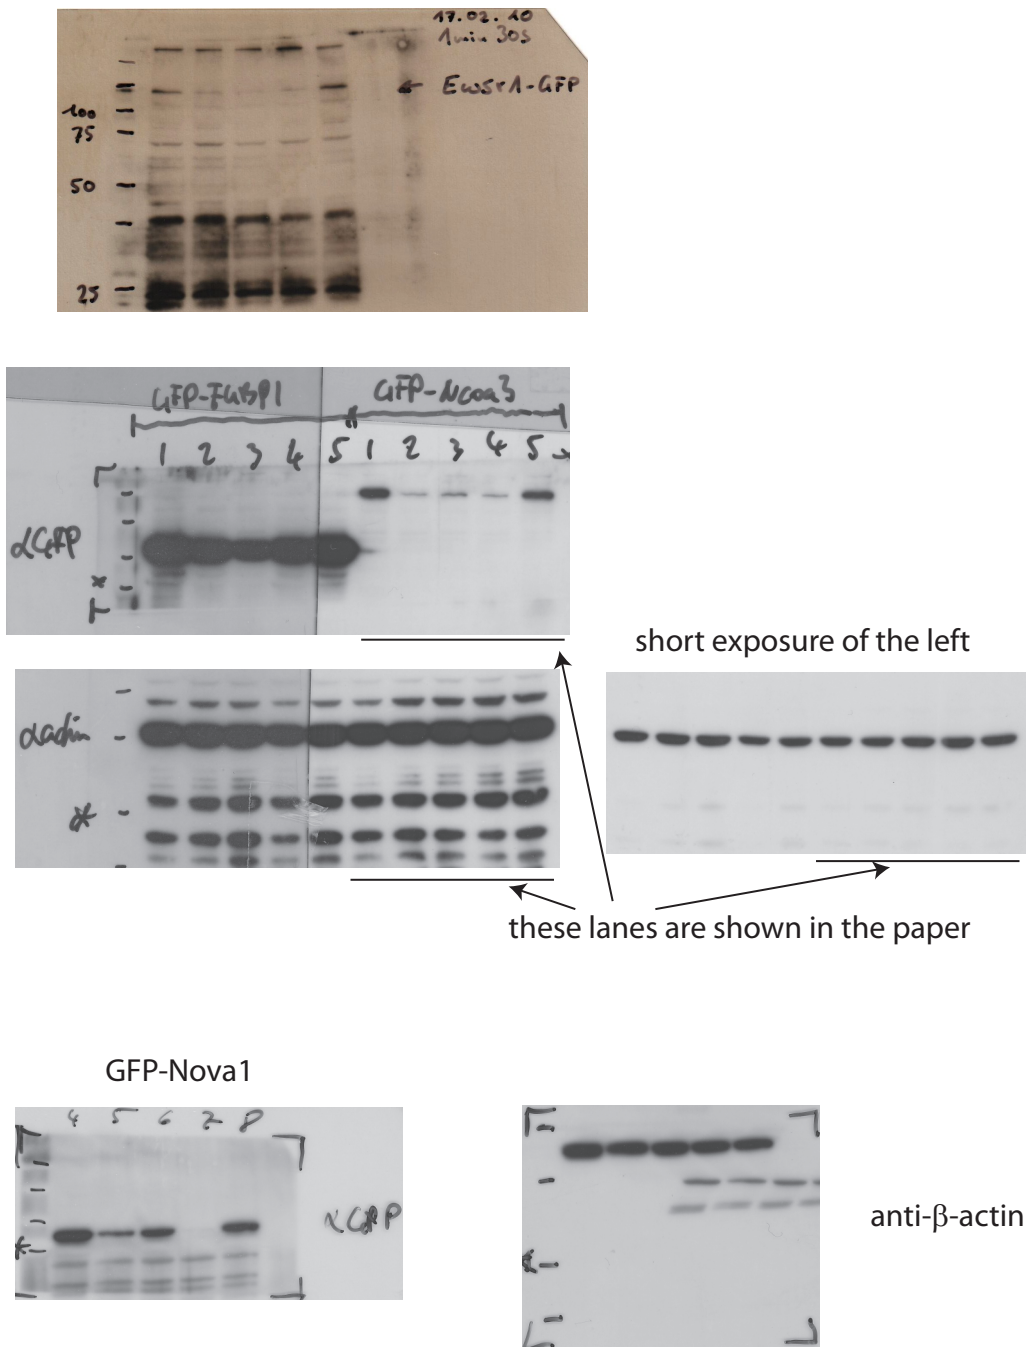

Supplement: embj0034-2237-sd2.pdf [file embj0034-2237-sd2.pdf]

Figure S2

A: A:

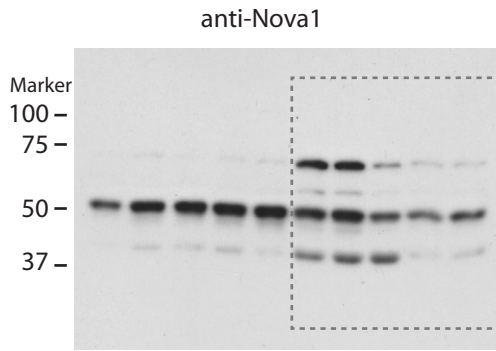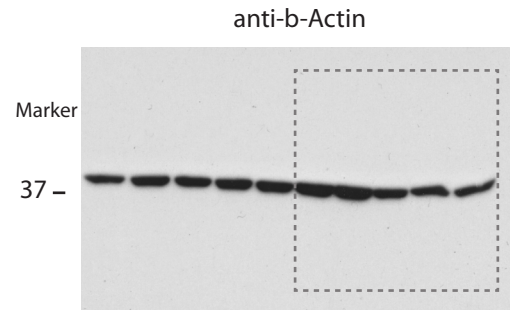

used in this figure

B: anti-Nova1

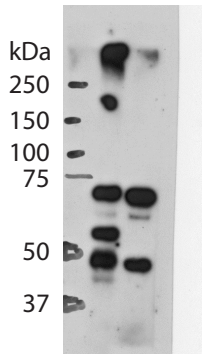

C:

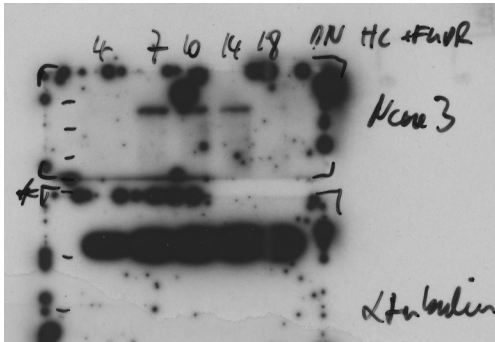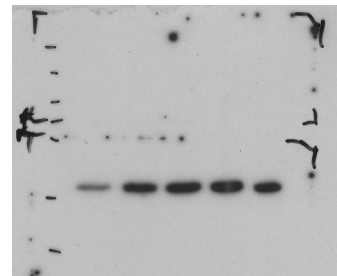

Supplement: embj0034-2237-sd3.pdf [file embj0034-2237-sd3.pdf]

Figure S3

A:

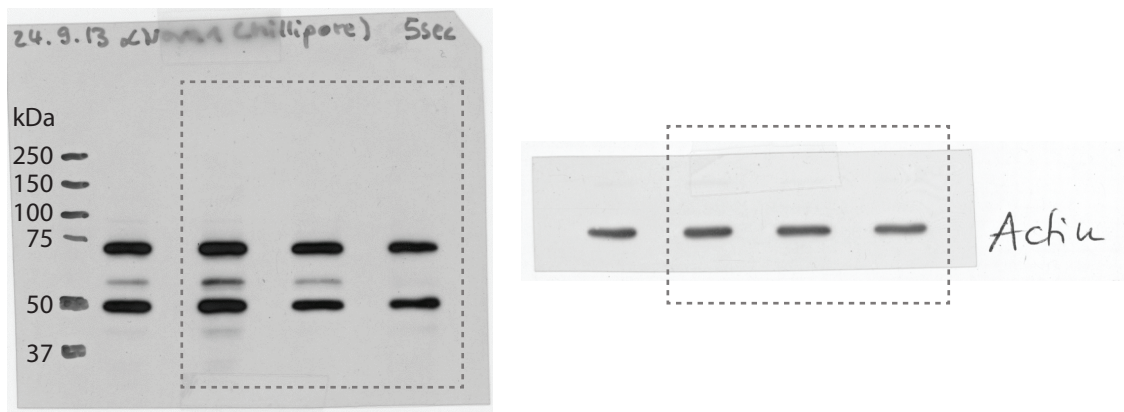

used in this figure

B:

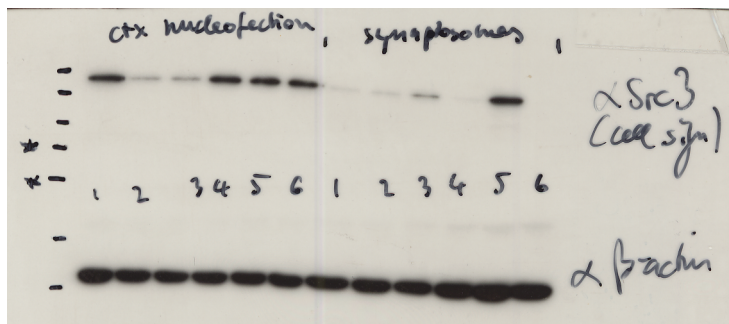

lanes 1-5 are presented in Fig. S3B

Supplement: embj0034-2237-sd4.pdf [file embj0034-2237-sd4.pdf]

Figure S5

A:

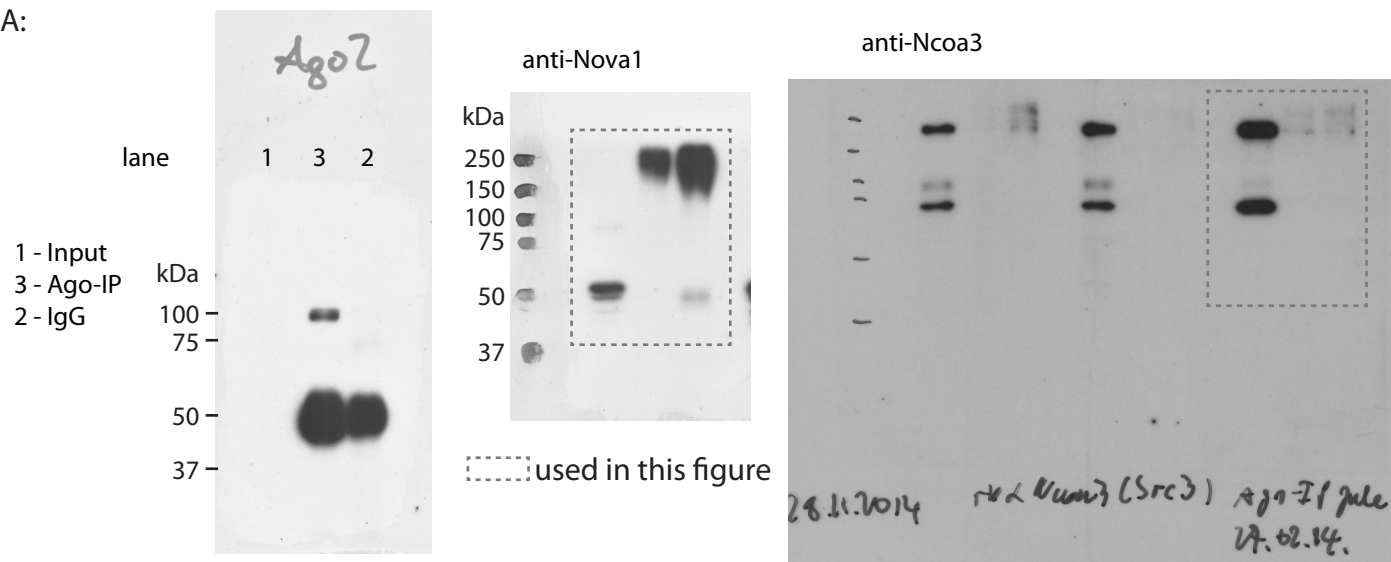

C:

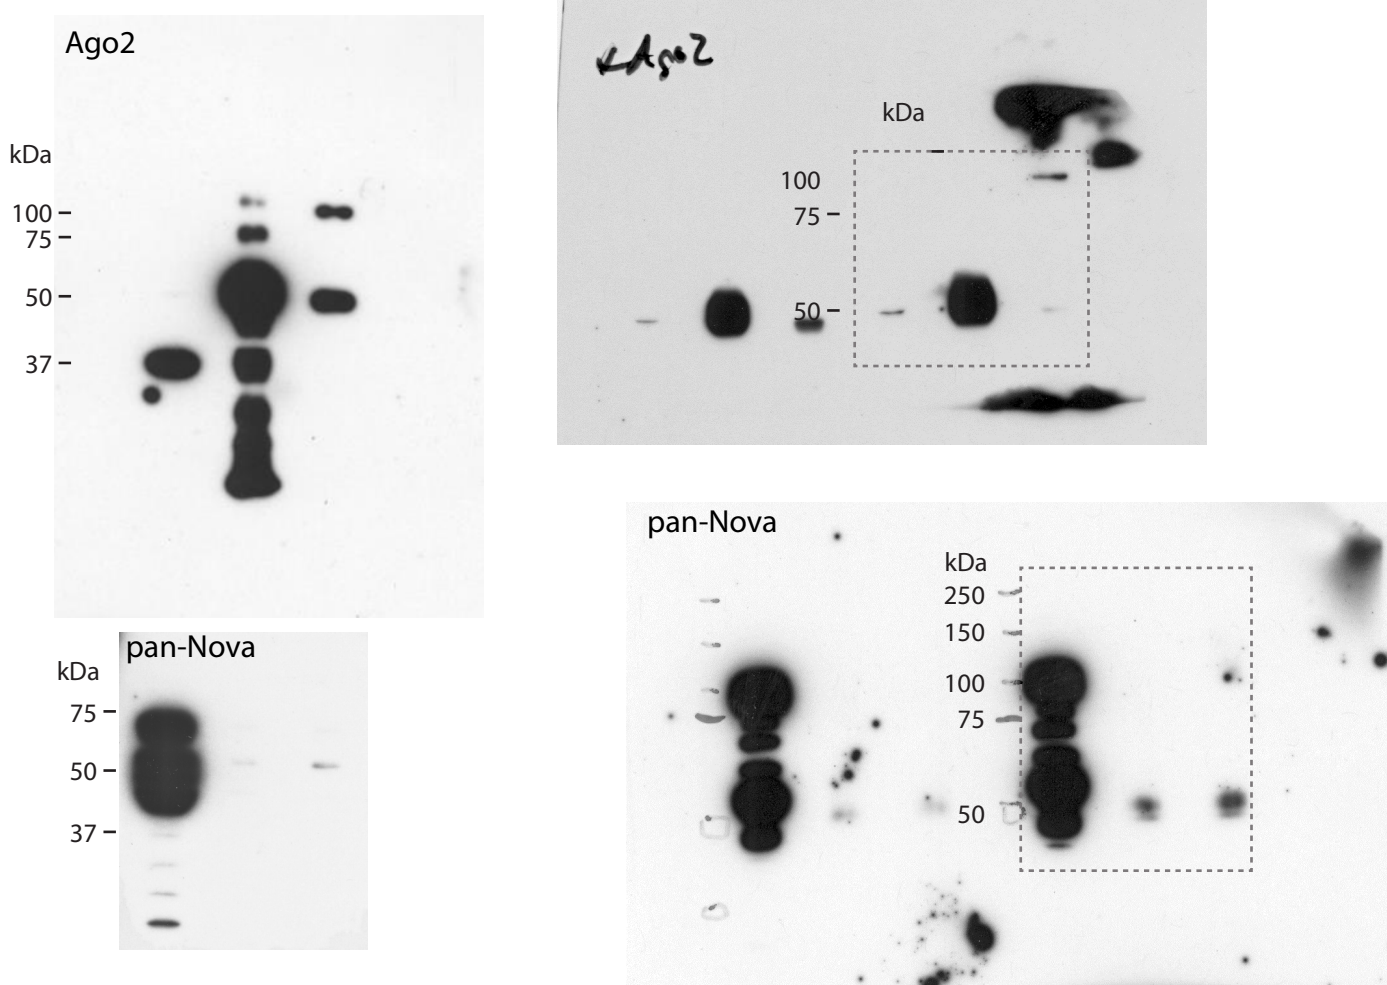

F

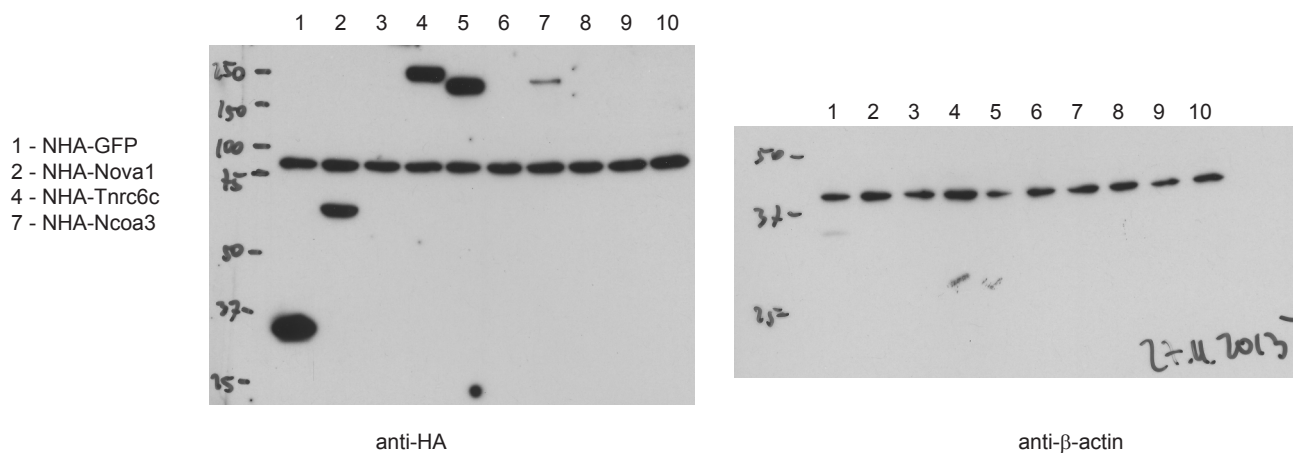

Supplement: embj0034-2237-sd6.pdf [file embj0034-2237-sd6.pdf]

Figure S6

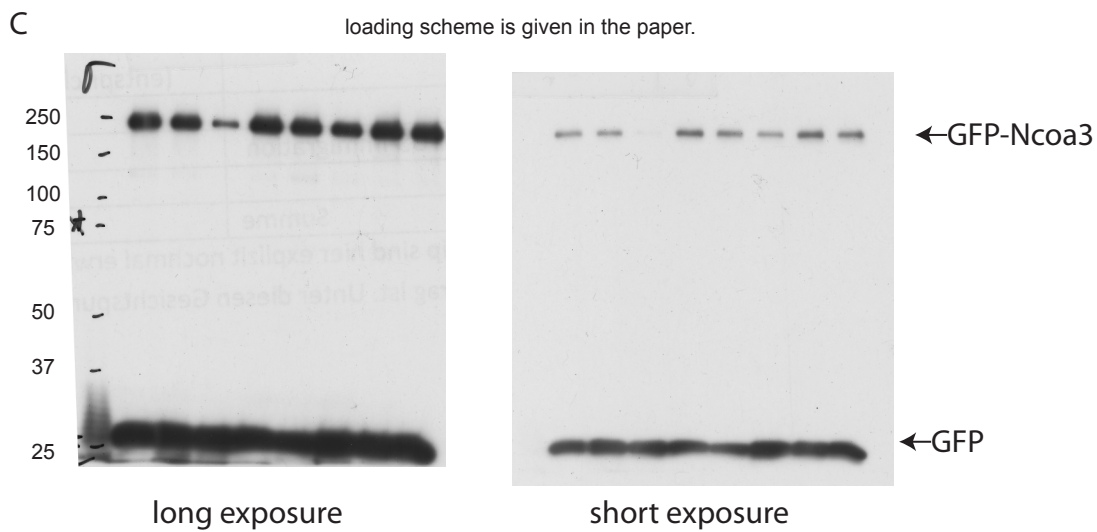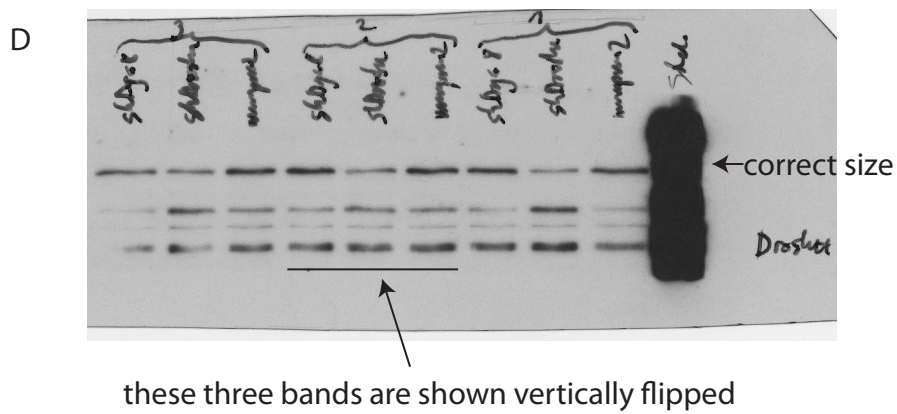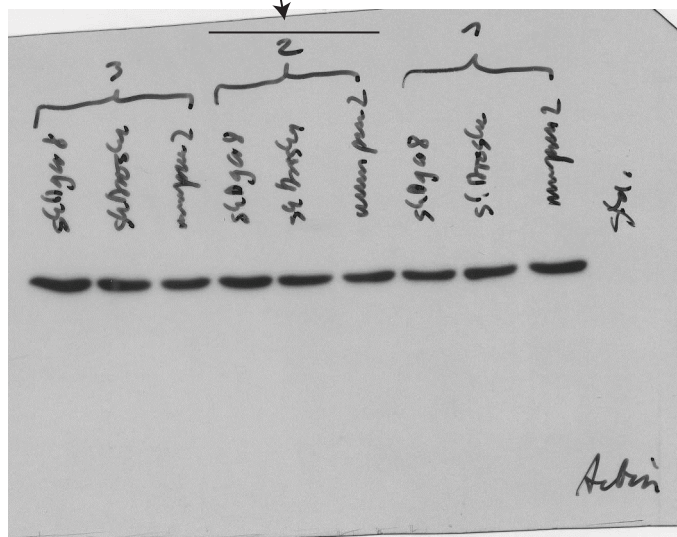

Supplement: embj0034-2237-sd7.pdf [file embj0034-2237-sd7.pdf]

Figure S7: Western blots used for Ago2 quantification Fig. S7D

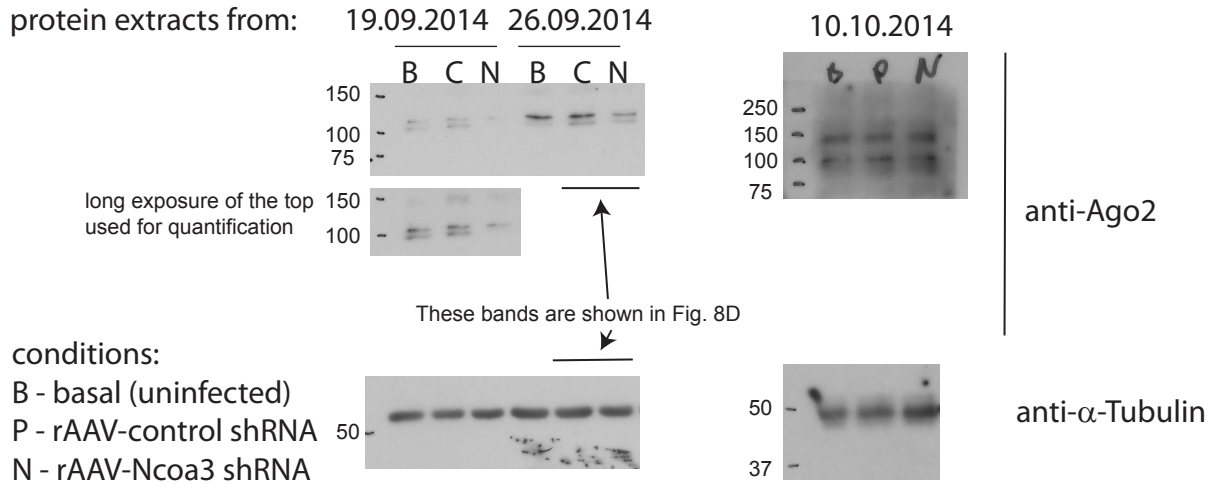

Supplement: embj0034-2237-sd8.pdf [file embj0034-2237-sd8.pdf]

Figure S8

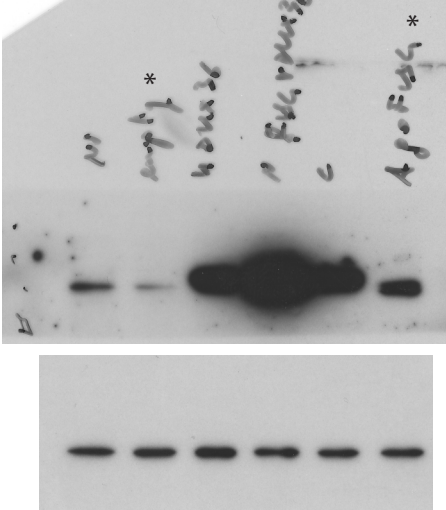

\*) this lanes are shown in Fig. S8B

anti-Flag

anti- $\alpha$ -Tubulin

Supplement: embj0034-2237-sd9.pdf [file embj0034-2237-sd9.pdf]
